# Supplementary material for: General practitioners’ attitudes towards opioids for non-cancer pain: a qualitative systematic review
Source: HighWire-hosted journal article supplement (doi:10.1136/bmjopen-2021-054945), 2022-02-01
Supplement: bmjopen-2021-054945supp002_data_supplement.pdf [file bmjopen-2021-054945supp002_data_supplement.pdf]

| Supplementary table S2. Themes and subthemes         |                                                                                                                                                                                                                                  |
|------------------------------------------------------|----------------------------------------------------------------------------------------------------------------------------------------------------------------------------------------------------------------------------------|
| Theme                                                | Subthemes                                                                                                                                                                                                                        |
| <b>GPs caught in the middle of the opioid crisis</b> | <ul style="list-style-type: none"> <li>• GP's duty to treat pain</li> <li>• GP's duty towards society at large</li> </ul>                                                                                                        |
| <b>Are opioids always bad?</b>                       | <ul style="list-style-type: none"> <li>• Effectivity and side effects</li> <li>• addiction</li> <li>• Nature of pain</li> </ul>                                                                                                  |
| <b>GPs weighting scale to decide on opioids</b>      | <ul style="list-style-type: none"> <li>• GP factors</li> <li>• Patient factors</li> <li>• GP-patient relationship factors</li> </ul>                                                                                             |
| <b>GP's sense of powerlessness</b>                   | <ul style="list-style-type: none"> <li>• Dumped on the GP</li> <li>• Lack of alternatives</li> <li>• Lack of knowledge and evidence /education</li> <li>• Lack of legislation and appropriate protocols and contracts</li> </ul> |
